# Supplementary material
Source: Springer Nature journal article supplement (https://www.springermedizin.de/resource/supplementary/12889_2011_3181_MOESM3_ESM.pdf/9488252)
Supplement: MOESM3 [file 9488252]

**Welcome page**  
Patient log-in into the system with the given username and password.

**Homepage**  
Patient is provided with a short instruction on how to use the website

**My Profile**

- Patient's personal profile consists of primary and secondary outcomes.
- This section is updated at baseline and 6-month.

**Module bar**

- A drop-down menu consists of 12 dietary modules that are developed for the intervention.
- This section is updated every fortnight.

**Side bar**

- Factsheets on diabetes mellitus
- Statistics on diabetes
- BMI calculator
- Cut-off values for physical measurements
- Motivational quotes
- Links to other diabetes

**Staging questions and immediate recommendations**

- Each module begins with a list of 5 staging questions.
- The patient is then taken to appropriate recommendation page tailored to the corresponding stage.

**Query**

- Patient is given the option to ask further questions to the study nutritionist.
